# Supplementary material for: SARS-CoV2 variant-specific replicating RNA vaccines protect from disease following challenge with heterologous variants of concern
Source: eLife. 2022 Feb 22;11:e75537. doi: 10.7554/eLife.75537 (PMC8983041; doi:10.7554/eLife.75537)
Supplement: Figure 1—source data 1. [file elife-75537-fig1-data1.xlsx]

## Sheet: Sheet1
	600						604		671		673		675		676		699
80							1.7562	1.6649	0.89	1.0598	1.0735	1.023	0.5708	0.5534	0.9732	0.9593	1.7441	1.188
53.3333	0.6513	0.7825	0.505	0.6216	0.5131	0.5286	2.1305	1.9933	1.0697	0.6308	1.1706	1.1227	0.6646	0.5699	1.153	1.022	1.5939	1.6142
35.5556	0.7184	0.8411	0.524	0.6201	0.5135	0.5258	1.7521	1.7159	1.046	0.6354	1.0996	1.0964	0.598	0.4645	1.135	1.082	1.4897	1.2476
23.7037	0.7445	0.821	0.5217	0.544	0.5653	0.5667	1.1126	1.2166	1.1201	0.2645	0.889	0.7776	0.4983	0.3401	0.8674	0.8676	1.0246	0.8382
15.8025	0.4017	0.4793	0.3917	0.4036	0.437	0.4658	0.6323	0.7092	0.5866	0.2327	0.642	0.465	0.3026	0.2537	0.4446	0.3231	0.5827	0.4404
10.535	0.2575	0.3528	0.2489	0.2893	0.1779	0.3623	0.3935	0.3803	0.655	0.1703	0.3787	0.2637	0.2173	0.1669	0.4505	0.3349	0.3542	0.3084
7.02332	0.1892	0.3234	0.1892	0.2015	0.1987	0.2149	0.3066	0.3603	0.2636	0.1671	0.2176	0.1899	0.1804	0.165	0.3081	0.3915	0.3041	0.2616
4.68221	0.1653	0.1649	0.1844	0.1992	0.1543	0.1712	0.2765	0.2739	0.1319	0.1362	0.1913	0.1584	0.1685	0.1769	0.2043	0.1261	0.284	0.2446
3.12148	0.16	0.17	0.1924	0.1817	0.1637	0.1611	0.2696	0.2521	0.2349	0.1492	0.1903	0.1637	0.1672	0.158	0.1657	0.1556	0.2488	0.2356
600		604		671		673		675		676
15.0196	1.31078	21.153	1.14255	19.9384	3.22422	18.311	1.65792	22.7316	4.28881	19.1194	1.48369
