# Supplementary material for: SARS-CoV2 variant-specific replicating RNA vaccines protect from disease following challenge with heterologous variants of concern
Source: eLife. 2022 Feb 22;11:e75537. doi: 10.7554/eLife.75537 (PMC8983041; doi:10.7554/eLife.75537)
Supplement: Figure 2—source data 1. [file elife-75537-fig2-data1.xlsx]

## Sheet: Figure 2
Challenge
A.1	Vaccine										B.1	Vaccine
	A.1	320	1280	640	1280	160	1280	1280	320			A.1	2560	320	2560	640	1280	5120	320	5120
	B.1	640	640	320	640	80	5120	2560	320			B.1	5120	320	5120	320	1280	5120	640	1280
	B.1.1.7	80	640	160	320	40	10	1280	160			B.1.1.7	640	80	640	160	640	1280	80	320
	B.1.351	10	160	640	20	80	10	10	80			B.1.351	10	80	640	80	40	10	40	40
B.1.1.7	Vaccine
	A.1	2560	1280	40	5120	160	320	320	320		B.1 Pre-F	Vaccine	640	640	80	640	1280	1280	2560	640
	B.1	1280	2560	40	5120	320	640	640	640			A.1	1280	640	160	1280	2560	2560	1280	1280
	B.1.1.7	2560	2560	160	2560	320	320	2560	640			B.1	320	80	80	320	1280	1280	640	320
	B.1.351	320	20	20	2560	80	40	80	20			B.1.1.7	160	20	80	640	40	640	640	160
B.1.3.51	Vaccine											B.1.351
	A.1	80	80	320	160	320	160	40	40
	B.1	80	80	640	160	320	320	80	40
	B.1.1.7	40	20	80	80	80	160	10	40
	B.1.351	320	160	2560	640	1280	640	320	640
	S								RBD								S1								S2
600 A.1	3218.6	4225.02	2487.87	2840.88	1902.62	14156	2990.2	719.679	1	65.4378	127.631	37.6359	7.92974	1.77091	5.6395	1	434.937	601.473	242.572	586.407	550.26	1385.8	774.204	264.148	122.668	91.982	332.997	275.257	331.018	58.7763	521.054	104.129
675 B.1	556.304	393.162	9283.49	639.175	601.226	1549.01	374.95	1234.64	1	3.33189	42.368	1	64.7199	1	4.76562	1.18789	70.0834	729.086	267.136	269.488	465.347	134.226	127.794		49.9837	207.129	60.1883	94.0729	312.975	106.144	123.038
676 B.1	3898.87	1434.31	892.26	2661.74	13304.8	15479.5	7890.54	10046.5	1.05724	36.8598	5.05031	55.736	1	66.6105	1.43378	62.0321	154.304	146.718	52.6715	200.02	721.911	796.595	431.545	341.84	83.5211	23.6683	14.2747	18.3688	966.45	1510.4	297.815	1129
673 B.1.1.7	6782.88	10097.3	631.687	12388.4	2809.67	5358.19	1999.2	1531.32	1.85778	1	1	4.30042	15.8955	354.657	1	1	569.152	1198.08	518.462	15081.9	11324.8	5272.52	3828.76	2420.71	52.3517	8.44996	39.1351	38.3827	357.588	16.2534	32.2095	43.0988
671 B.1.351	4111.72	952.056	8246.05	3829.34	2100.33	1133.9	633.148	2459.68	418.605	8.75854	2.10369	33.6807	72.1981	1.68996	1.03653	20.4638	4312.52	486.677	11603.3	1981.69	2683.86	2445.51	783.935	2622.61	259.628	6.15064	478.355	392.708	26.7242	28.4108	85.1103	294.827
