# Supplementary material for: SARS-CoV2 variant-specific replicating RNA vaccines protect from disease following challenge with heterologous variants of concern
Source: eLife. 2022 Feb 22;11:e75537. doi: 10.7554/eLife.75537 (PMC8983041; doi:10.7554/eLife.75537)
Supplement: Figure 3—source data 1. [file elife-75537-fig3-data1.xlsx]

## Sheet: Figure 3
Vaccine	A.1												B.1.1.7												B.1.351												B.1.617.2
604 (A.1)	3840	3840	960	2560	1280	2560	320	1920	2560	3840	7680	2560	2560	1280	640	2560	1280	2560	320	1280	1280	2560	2560	2560	640	80	80	320	80	320	80	80	80	80	1280	320	640	640	160	640	320	1280	80	320	160	320	640	320
673 (B.1.1.7)	1280	2560	640	5120	640	2560	320	1280	2560	640	1280	320	2560	7680	1280	7680	1280	5120	1280	2560	5120	1280	2560	1920	320	1280	80	2560	80	80	80	80	640	80	160	80	1280	640	320	1280	320	640	160	2560	2560	640	1280	640
671 (B.1.351)	160	80	320	80	160	320	160	1280	160	5120	640	640	160	640	640	80	320	640	160	640	80	5120	640	1280	1920	960	3840	240	960	2560	480	1920	1600	7680	3840	1920	80	80	160	80	80	160	80	320	80	5120	320	640
