# Supplementary material for: SARS-CoV2 variant-specific replicating RNA vaccines protect from disease following challenge with heterologous variants of concern
Source: eLife. 2022 Feb 22;11:e75537. doi: 10.7554/eLife.75537 (PMC8983041; doi:10.7554/eLife.75537)
Supplement: Figure 4—source data 1. [file elife-75537-fig4-data1.xlsx]

## Sheet: Figure 4
A.1 challenge
qRT-PCR	Mock						604 (A.1)						671 (B.1.351)						673 (B.1.1.7)
D2	139312	252352	216429	2011746	16067009	5506733	238172	2005438	212132	1123296	3813012	141391	1226200	451177	609925	2074970	259720	177617	809261	668184	13772.2	3500	101230	245690
D4	85504.7	1201066	408368	1257793	682094	1593405	63193.7	6746.87	660407	63458.2	118879	116900	152024	669444	225740	139266	227280	12943.2	14138.3	168288	218803	3500	357916	140917
TCID50	Mock						604 (A.1)						671 (B.1.351)						673 (B.1.1.7)
D2	889.14	889.14	889.14	5000	2811.71	28117.1	88.9	88.9	88.9	88.9	2811.71	88.914	281.171	281.171	158.114	8891.4	158.114	88.914	88.914	88.914	88.9	88.9	88.9	88.9
D4	88.9	88.914	889.14	1581.14	889.14	1581.14	88.9	88.9	88.9	88.9	88.9	88.9	88.9	219.699	88.9	2811.71	250.594	219.699	88.9	88.9	88.9	88.9	88.9	88.9
B.1.351
qRT-PCR	Mock						604 (A.1)						671 (B.1.351)						673 (B.1.1.7)
D2	9055081	247122	826772	1150454	2286435		163954	3505.7	55977.9	1270175	128922	974168	20242.2	33235.5	3500	3500	1593117	3500	1422428	232328	362172	217883	435316	619456
D4	4963654	1443805	2698361	4051020	384038		239641	36602	76219.5	235768	17980	30719.3	131938	83127.6	91257.4	3500	3500	3500	689724	17078.1	16804.9	347348	145402	123475
TCID50	Mock						604 (A.1)						671 (B.1.351)						673 (B.1.1.7)
D2	88914	1581.14	8891.4	15811.4	8891.4		281.171	88.9	88.9	88.9	88.9	1581.14	88.9	88.9	88.9	88.9	88.914	88.9	158.114	88.9	88.9	88.9	158.114	158.114
D4	28117.1	210848	1581.14	15811.4	8891.4		88.9	88.9	158.114	88.9	88.9	88.9	88.9	88.9	88.9	88.9	88.9	88.9	88.9	88.9	88.9	88.9	88.914	88.9
B.1.1.7
qRT-PCR	Mock						604 (A.1)						671 (B.1.351)						673 (B.1.1.7)
D2	3.1304e+07	1.63452e+07	1.19708e+07	1.86408e+07	1.3413e+07	1.22959e+07	4.88817e+06	1.15754e+06	4.74973e+06	1.56412e+06	366146	1.16431e+06	4.00589e+06	3499	3499	646689	137334	129536	241480	87154.9	54743.7	1.51569e+06	22181.8	1.07899e+07
D4	1.84511e+06	1.57363e+06	3.70725e+06	1.42181e+06	7.18215e+06	1.25903e+06	849647	694885	14267.5	3499	187146	1.05193e+06	38497.6	1.60156e+06	66868.7	865809	3499	232999	562035	525720	1.15815e+06	3499	95020.7	977546
TCID50	Mock						604 (A.1)						671 (B.1.351)						673 (B.1.1.7)
D2	158114	50000	28117.1	11856.9	2811.71	8891.4	158.114	88.914	500	281.171	158.114	889.14	500	88.9	88.9	88.9	88.9	88.9	88.9	88.9	88.9	88.9	88.9	88.914
D4	2811.71	889.14	23207.9	5000	5000	158.114	88.9	88.9	88.9	88.9	88.9	1581.14	88.9	88.9	88.9	88.9	88.9	88.9	88.9	88.9	88.9	88.9	88.9	88.9
