# Supplementary material for: SARS-CoV2 variant-specific replicating RNA vaccines protect from disease following challenge with heterologous variants of concern
Source: eLife. 2022 Feb 22;11:e75537. doi: 10.7554/eLife.75537 (PMC8983041; doi:10.7554/eLife.75537)
Supplement: Figure 5—source data 1. [file elife-75537-fig5-data1.xlsx]

## Sheet: Figure 5
A.1 challenge	Mock						604 (A.1)						671 (B.1.351)						673 (B.1.1.7)
qPCR	17860376	2657942	4490961	6695339	5164600	118000000	13.6	13.6	13.6	13.6	13.6	13.6	1164.52	13.6	13.6	13.6	13.6	13.6	13.6	13.6	13.6	13.6	13.6	13.6
TCID50	34197.7	7209.5	74095	46796.8	23599.1	78103	2.96333	1.61636	2.4027	5.55625	1.93261	13.8889	2.96333	2.69394	2.06744	2.54	2.13667	1.81429	3.86522	1.93261	3.70417	1.74314	1.93261	2.33947
B.1.351	Mock						604 (A.1)						671 (B.1.351)						673 (B.1.1.7)
qPCR	13808.8	3970.8	6137.03	158179	764821		18769	13.6	13.6	13.6	13.6	13.6	13.6	13.6	13.6	13.6	13.6	13.6	13.6	13.6	13.6	13.6	13.6	13.6
TCID50	286.819	2.27949	520.686	85.2032	216.594		2.61471	2.27949	2.54	1.16974	1.27	1.36769	1.20135	1.16974	1.50678	1	1.778	1.61636	1.05833	1.28841	1.25211	1.38906	1.74314	1.21781
B.1.1.7	Mock						604 (A.1)						671 (B.1.351)						673 (B.1.1.7)
qPCR	4033279	4068393	1027878	1892121	2409335	10447921	13.6	13.6	13.6	13.6	13.6	13.6	13.6	13.6	13.6	13.6	13.6	54.7701	13.6	13.6	13.6	13.6	13.6	13.6
TCID50	24030.8	39528.5	9372.36	133891	87841	216285	4.93889	6.83846	7.40833	6.35	5.22941	6.83846	3.29259	17.78	3.175	4.23333	2.46944	5.55625	3.29259	4.23333	5.92667	9.87778	3.86522	4.67895
