# Supplementary material for: SARS-CoV2 variant-specific replicating RNA vaccines protect from disease following challenge with heterologous variants of concern
Source: eLife. 2022 Feb 22;11:e75537. doi: 10.7554/eLife.75537 (PMC8983041; doi:10.7554/eLife.75537)
Supplement: Figure 7—source data 1. [file elife-75537-fig7-data1.xlsx]

## Sheet: Figure 7
	H&E				IHC				Lung weights
A.1 challenge	Mock	604 (A.1)	671 (B.1.351)	673 (B.1.1.7)	Mock	604 (A.1)	671 (B.1.351)	673 (B.1.1.7)	Mock	604 (A.1)	671 (B.1.351)	673 (B.1.1.7)
	13	0	4	2	3	0	0	0	0.61295	0.586765	0.669427	0.663158
	13	0	0	0	3	0	0	0	1.1	0.795	0.623567	0.629008
	7	0	0	0	3	0	0	0	0.673723	0.615663	0.560403	0.565347
	4	0	3	0	2	0	1	0	1.0049	0.751299	0.536496	0.541606
	9	0	0	4	3	0	0	0	0.684932	0.565734	0.608163	0.724409
	7	0	0	0	3	0	0	0	0.882203	0.542763	0.557246	0.542636
B.1.351 challenge	Mock	604 (A.1)	671 (B.1.351)	673 (B.1.1.7)	Mock	604 (A.1)	671 (B.1.351)	673 (B.1.1.7)	Mock	604 (A.1)	671 (B.1.351)	673 (B.1.1.7)
	11	0	0	0	2	0	0	0	0.763393	0.6	0.6375	0.572932
	0	0	0	0	1	0	0	0	0.619853	0.513699	0.621212	0.588971
	8	0	0	0	2	0	0	0	0.731356	0.434286	0.585625	0.578358
	0	0	0	0	2	0	0	0	0.628859	0.50604	0.532143	0.57197
	0	0	0	0	2	0	0	0	0.576101	0.588966	0.655056	0.633588
		0	0	0		0	0	0		0.485	0.605	0.511905
B.1.1.7 challenge	Mock	604 (A.1)	671 (B.1.351)	673 (B.1.1.7)	Mock	604 (A.1)	671 (B.1.351)	673 (B.1.1.7)	Mock	604 (A.1)	671 (B.1.351)	673 (B.1.1.7)
	8	0	0	0	3	0	0	0	0.897744	0.5344	0.561935	0.616092
	15	0	0	0	3	0	0	0	0.630075	0.501408	0.574648	0.571242
	14	0	0	0	3	0	0	0	0.773381	0.629508	0.565101	0.585455
	14	1	1	0	3	0	0	0	0.691406	0.533099	0.536735	0.52349
	5	0	0	1	3	0	0	0	0.71203	0.502703	0.557143	0.535338
	8	0	1	1	3	1	0	0	0.615625	0.557246	0.533077	0.612712
