# Supplementary material for: SARS-CoV2 variant-specific replicating RNA vaccines protect from disease following challenge with heterologous variants of concern
Source: eLife. 2022 Feb 22;11:e75537. doi: 10.7554/eLife.75537 (PMC8983041; doi:10.7554/eLife.75537)
Supplement: Supplementary file 1. — Formalin-fixed lung tissue was stained with H&E or viral antigen detected via IHC. Sections were scored by a certified pathologist blinded to study groups. Representative images are shown in Figure 6, scores in Figure 7, and complete summary of findings are provided here. [file elife-75537-supp1.xlsx]

## Sheet: Sheet1
		Animal Number	Lung Lesions
Vaccine	Challenge		no sig findings	exudate	bronchiolitis	Int. pneumonia	vasculitis	% affected	IHC	remarks
Mock	A.1	HM01		4	4	2	3	50	3	4
		HM02		3	3	3	4	40	3	4
		HM03		1	3	1	2	30	3	3
		HM04		1	2		1	10	2	2
		HM05		1	3	1	4	40	3	4
		HM06		2	2	1	2	20	3	2
A.1		HM07	*						0
		HM08	*						0
		HM09	*						0
		HM10	*						0
		HM11	*						0
		HM12	*						0
B.1.351		HM13		1	1	2		20	0s	acute hem;2
		HM14	*						0
		HM15	*						0
		HM16		1	1		1	5	1e	tracheitis;1
		HM17	*						0
		HM18	*						0		1e= bronchial epithelium
B.1.1.7		HM19		1	1			5	0	1	0s= no immunoreactivity except for some splotches
		HM20	*						0
		HM21	*						0
		HM22	*						0
		HM23				2	2	30	0	fbr; 2
		HM24	*						0s
Mock	B.1.351	HM25		2	3	3	3	20	2	4
		HM26	*						1e
		HM27		2	2	2	2	30	2	3
		HM28	*						2
		HM29	*						2
A.1		HM30	*						0s
		HM31	*						0s
		HM32	*						0
		HM33	*						0s
		HM34	*						0s
		HM35	*						0s
B.1.351		HM36	*						0s
		HM37	*						0
		HM38	*						0
		HM39	*						0s
		HM40	*						0
		HM41	*						0
B.1.1.7		HM42	*						0s
		HM43	*						0
		HM44	*						0s
		HM45	*						0s
		HM46	*						0s
		HM47	*						0s
Mock	B.1.1.7	HM48		2	0	2	4	20	3	4
		HM49		4	3	4	4	50	3	4
		HM50		4	2	4	4	40	3	4
		HM51		4	4	3	3	50	3	tracheitis; 4
		HM52		2	1	1	1	20	3	2
		HM53		1	3	1	3	30	3	4
A.1		HM54	*						0s
		HM55	*						0s
		HM56	*						0s
		HM57		1				5	0s	1
		HM58	*						0s
		HM59	*						1e
B.1.351		HM60	*						0s
		HM61	*						0
		HM62	*						0s
		HM63		1				5	0	1
		HM64	*						0s
		HM65		1				5	0s	1
B.1.1.7		HM66	*						0
		HM67	*						0
		HM68	*						0
		HM69	*						0s
		HM70		1				5	0s	1
		HM71		1				5	0s	acute hem;1
			no sig findings	exudate	bronchiolitis	Int. pneumonia	vasculitis	% affected	IHC	remarks
		fbr=foreign body reaction
		hem=hemorrhage
